# Supplementary material for: Phototrophy and carbon fixation in Chlorobi postdate the rise of oxygen
Source: bioRxiv or medRxiv preprint supplement (doi:10.1101/2021.01.22.427768), 2021-01-24

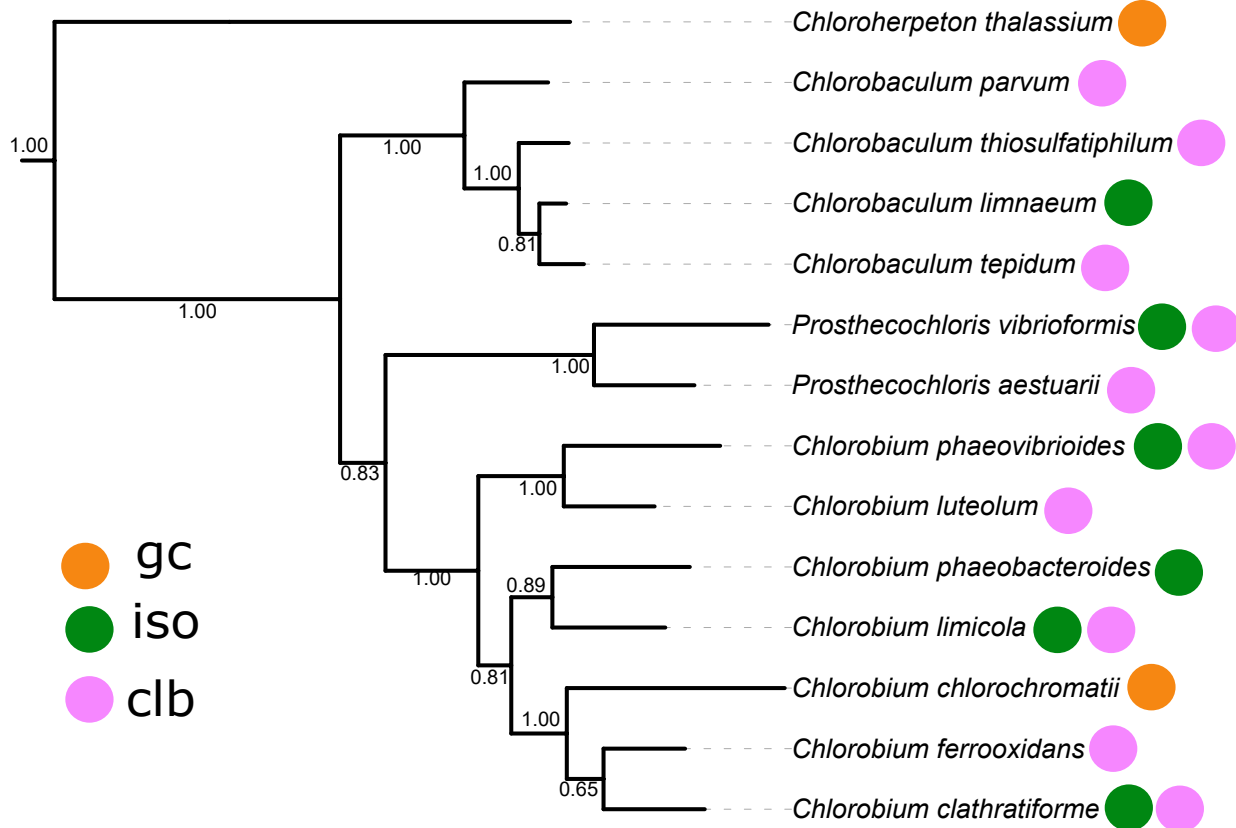

Supplement: Supplementary file [file media-6.pdf]
